# Supplementary material for: Azidothymidine “Clicked” into 1,2,3-Triazoles: First Report on Carbonic Anhydrase–Telomerase Dual-Hybrid Inhibitors
Source: PubMed Central journal article supplement (PMC8154556; doi:10.1021/acs.jmedchem.0c00636), 2020-05-28
Supplement: jm0c00636_si_001.pdf [file jm0c00636_si_001.pdf]

## Supporting Information for

# **Azidothymidine (AZT) “clicked” into 1,2,3-Triazoles: First Report on Carbonic Anhydrase-Telomerase Dual Hybrid Inhibitors**

Emanuela Berrino<sup>1</sup>, Andrea Angeli<sup>1</sup>, Dmitry D. Zhdanov<sup>2,3</sup>, Anna P. Kiryukhina<sup>2</sup>, Andrea Milaneschi<sup>1</sup>, Alessandro De Luca<sup>1</sup>, Murat Bozdogan<sup>1</sup>, Simone Carradori<sup>4</sup>, Silvia Selleri<sup>1</sup>, Gianluca Bartolucci<sup>1</sup>, Thomas S. Peat<sup>5</sup>, Marta Ferraroni<sup>6</sup>, Claudiu T. Supuran<sup>1\*</sup> and Fabrizio Carta<sup>1\*</sup>

<sup>1</sup> Università degli Studi di Firenze, NEUROFARBA Dept., Sezione di Scienze Farmaceutiche e Nutraceutiche, Via Ugo Schiff 6, 50019, Sesto Fiorentino (Florence), Italy

<sup>2</sup> Institute of Biomedical Chemistry, Pogodinskaya st. 10/8, 119121, Moscow, Russia

<sup>3</sup> Peoples Friendship University of Russia (RUDN University), Miklukho-Maklaya st. 6, 117198, Moscow, Russia.

<sup>4</sup> Department of Pharmacy "G. d'Annunzio" University of Chieti-Pescara Via dei Vestini 31, 66100, Chieti. Italy.

<sup>5</sup> CSIRO, 343 Royal Parade, Parkville, Victoria, 3052, Australia.

<sup>6</sup> Università di Firenze, Dipartimento di Chimica “Ugo Schiff”, Via della Lastruccia 3-13, 50019, Sesto Fiorentino (Florence), Italy.

\*corresponding authors

## **Table of Contents**

|                                                                   |               |
|-------------------------------------------------------------------|---------------|
| Summary of Data Collection and Atomic Model Refinement Statistics | <b>S2</b>     |
| HPLC-DAD method for purity analysis                               | <b>S3</b>     |
| HPLC traces                                                       | <b>S4-S23</b> |

**Table S1. Summary of Data Collection and Atomic Model Refinement Statistics**

|                                                            | <b>HCAII + 1b</b>                                  | <b>HCAII + 3b</b>                      |
|------------------------------------------------------------|----------------------------------------------------|----------------------------------------|
| PDB ID                                                     | 6YPW                                               | 6WKA                                   |
| Wavelength (Å)                                             | 1.00000                                            | 1.00000                                |
| Space Group                                                | P2 <sub>1</sub>                                    | P2 <sub>1</sub>                        |
| Unit cell (a, b, c, $\alpha$ , $\beta$ , $\gamma$ ) (Å, °) | 42.387, 41.358, 72.075,<br>90.000, 104.385, 90.000 | 42.2, 41.5, 72.0,<br>90.0, 104.4, 90.0 |
| Limiting resolution (Å)                                    | 41.36-1.10 (1.11-1.10)                             | 41.5-1.34 (1.36-1.34)                  |
| Unique reflections                                         | 88794 (2400)                                       | 49061                                  |
| Rmerge (%)                                                 | 4.8 (43.7)                                         | 7.8 (47.2)                             |
| Rmeas (%)                                                  | 5.5 (45.9)                                         | -                                      |
| Rpim (%)                                                   | 3.1 (31.5)                                         | 3.1 (20.8)                             |
| Redundancy                                                 | 6.3 (4.6)                                          | 7.1 (5.7)                              |
| Completeness overall (%)                                   | 90.7 (49.3)                                        | 95.0 (74.6)                            |
| $\langle I/\sigma(I) \rangle$                              | 19.5 (3.1)                                         | 14.3 (2.9)                             |
| CC (1/2)                                                   | 0.999 (0.831)                                      | 0.999 (0.848)                          |
| <b>Refinement statistics</b>                               |                                                    |                                        |
| Resolution range (Å)                                       | 41.092-1.1                                         | 39.9-1.34                              |
| Unique reflections, working/free                           | 84333/81550                                        | 1660/1270                              |
| Rfactor (%)                                                | 11.43                                              | 15.77                                  |
| Rfree(%)                                                   | 13.20                                              | 18.32                                  |
| r.m.s.d. bonds(Å)                                          | 0.0123                                             | 0.010                                  |
| r.m.s.d. angles (°)                                        | 1.8022                                             | 1.636                                  |
| <b>Ramachandran statistics (%)</b>                         |                                                    |                                        |
| Most favored                                               | 97.7                                               | 96.9                                   |
| additionally allowed                                       | 2.3                                                | 3.1                                    |
| outlier regions                                            | 0.0                                                | 0.0                                    |
| <b>Average B factor (Å<sup>2</sup>)</b>                    |                                                    |                                        |
| All atoms                                                  | 12.279                                             | 11.0                                   |
| inhibitors                                                 | 15.837                                             | 21.8                                   |
| solvent                                                    | 25.095                                             | 25.4                                   |

## HPLC-DAD method for purity analysis

The employed chromatographic parameters to check the purity of studied compounds were reported as follows:

- column, Luna PFP length = 50 mm, internal diameter= 2 mm; particle size = 3  $\mu\text{m}$  purchased from Phenomenex (Bologna, Italy);
- the eluents used were 5 mM ammonium formate in water solution (solvent A) and 10 mM ammonium formate in methanol (solvent B);
- flow rate and the injection volume were 0.35 mL min<sup>-1</sup> and 5  $\mu\text{L}$ , respectively.

The elution gradient is shown in **Table S2**.

**Table S2:** Elution gradient of mobile phase used for LC-DAD analysis

| Time (min) | A (%) |
|------------|-------|
| 0.00       | 90    |
| 8.00       | 10    |
| 14.00      | 10    |
| 14.01      | 90    |
| 20.00      | 90    |

## HPLC traces

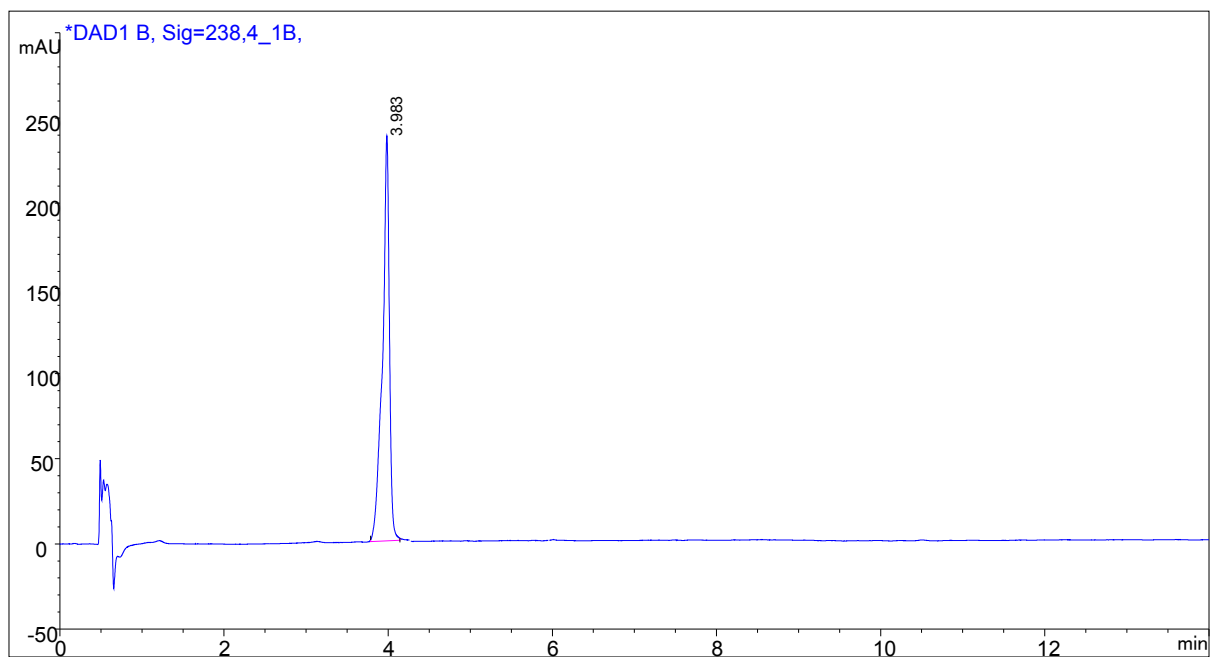

**Figure S1.** Chromatographic profile of **1b** monitored at  $\lambda=238$  nm.

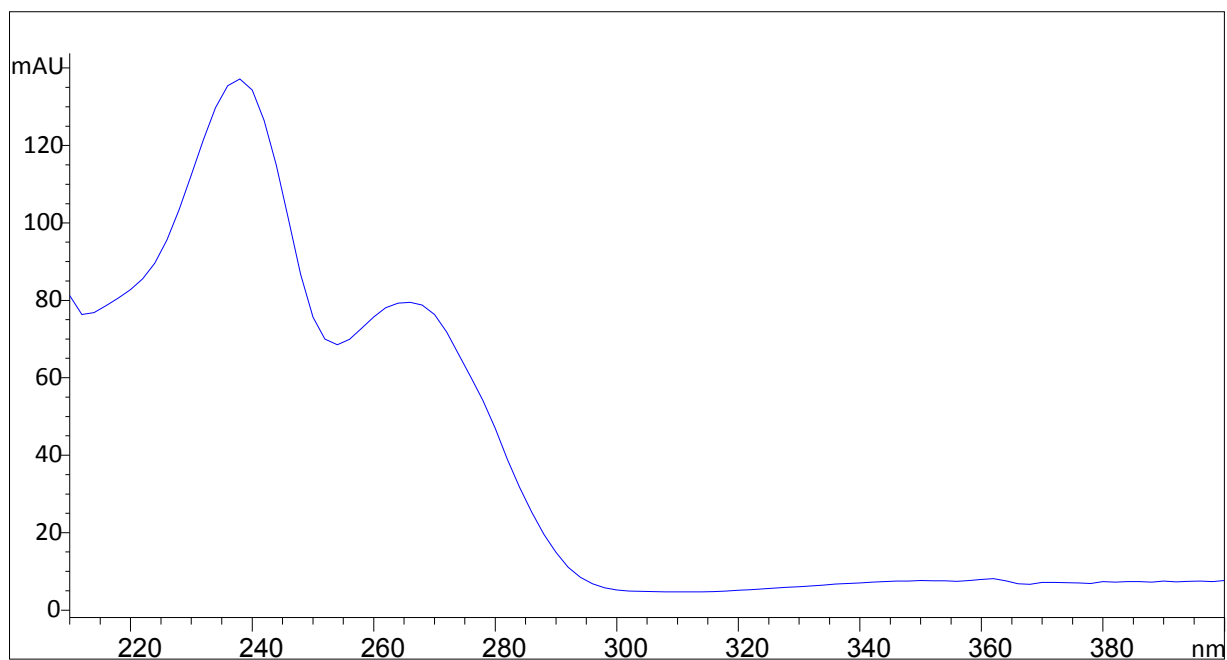

**Figure S2.** UV spectrum of the compound **1b**.

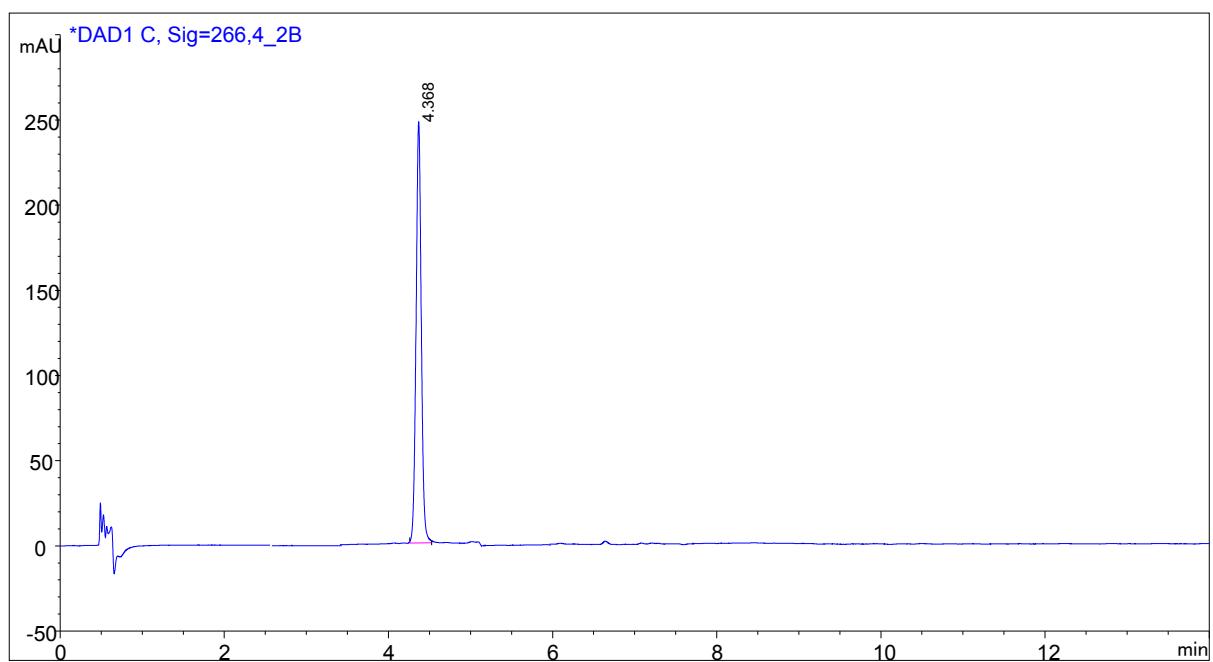

**Figure S3.** Chromatographic profile of **2b** monitored at  $\lambda=266$  nm.

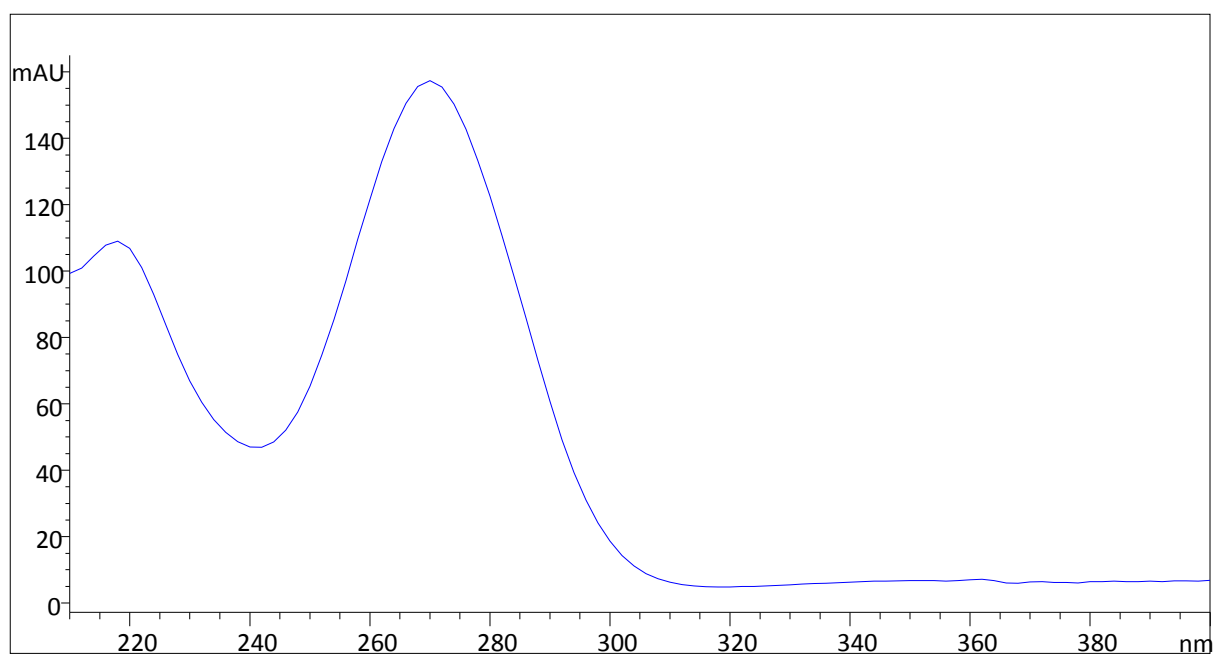

**Figure S4.** UV spectrum of the compound **2b**.

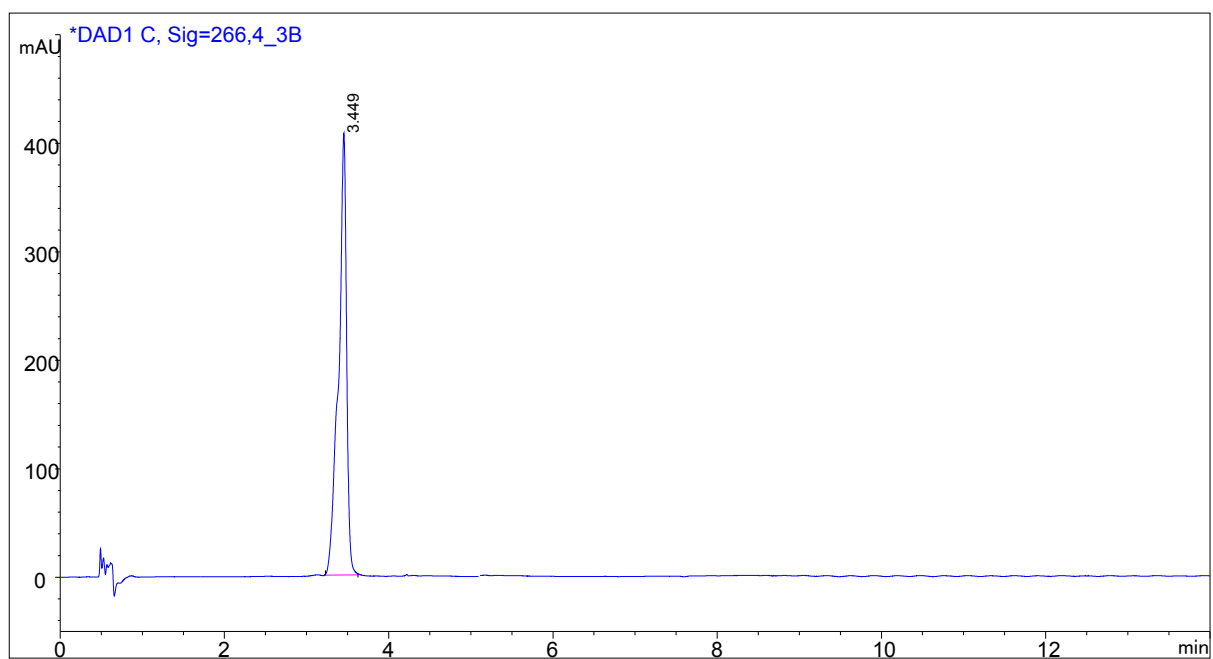

**Figure S5.** Chromatographic profile of **3b** monitored at  $\lambda=266$  nm.

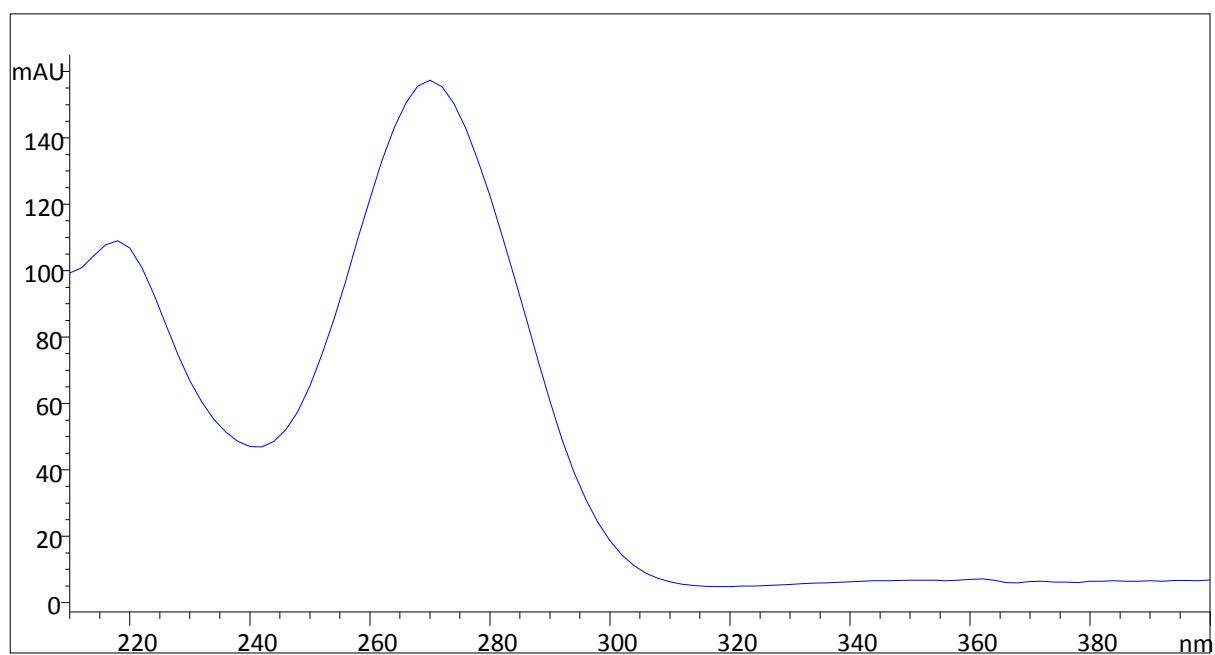

**Figure S6.** UV spectrum of the compound **3b**.

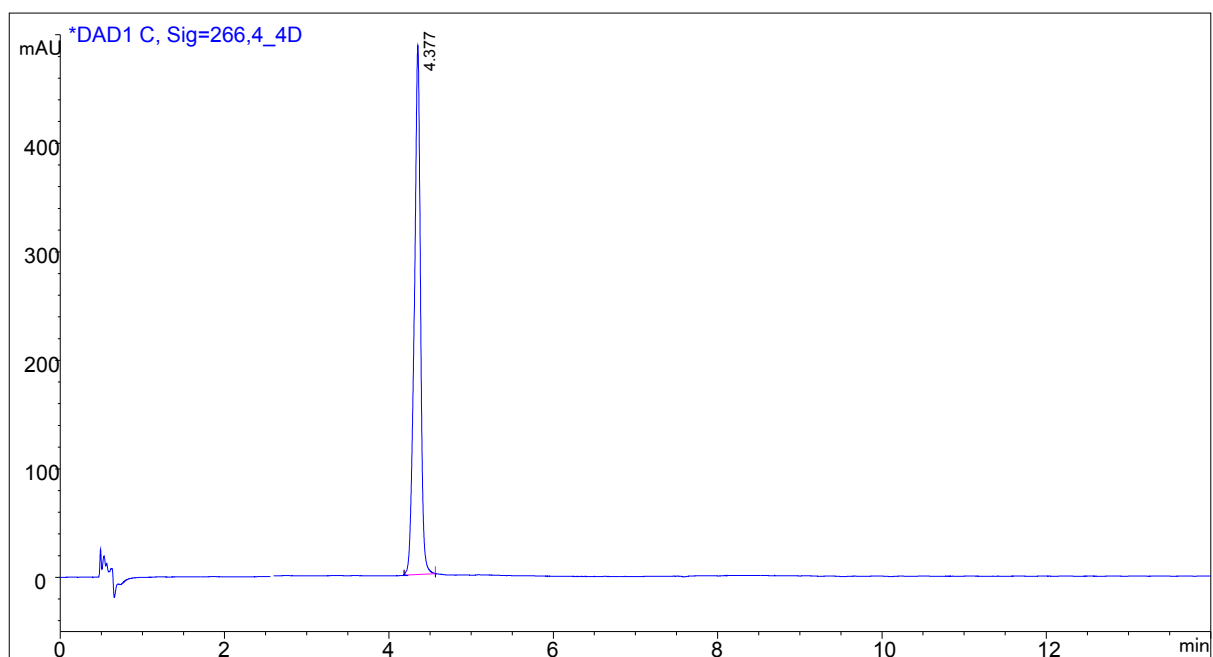

**Figure S7.** Chromatographic profile of **4d** monitored at  $\lambda=266$  nm.



**Figure S8.** UV spectrum of the compound **4d**.

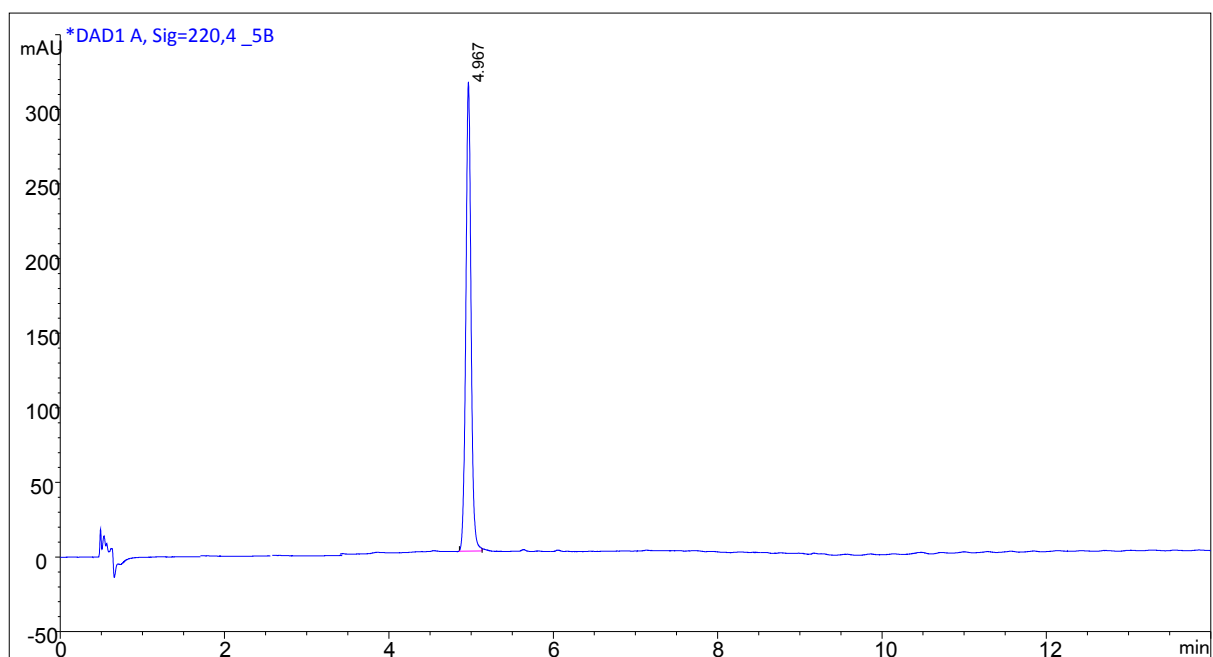

**Figure S9.** Chromatographic profile of **5b** monitored at  $\lambda=220$  nm.

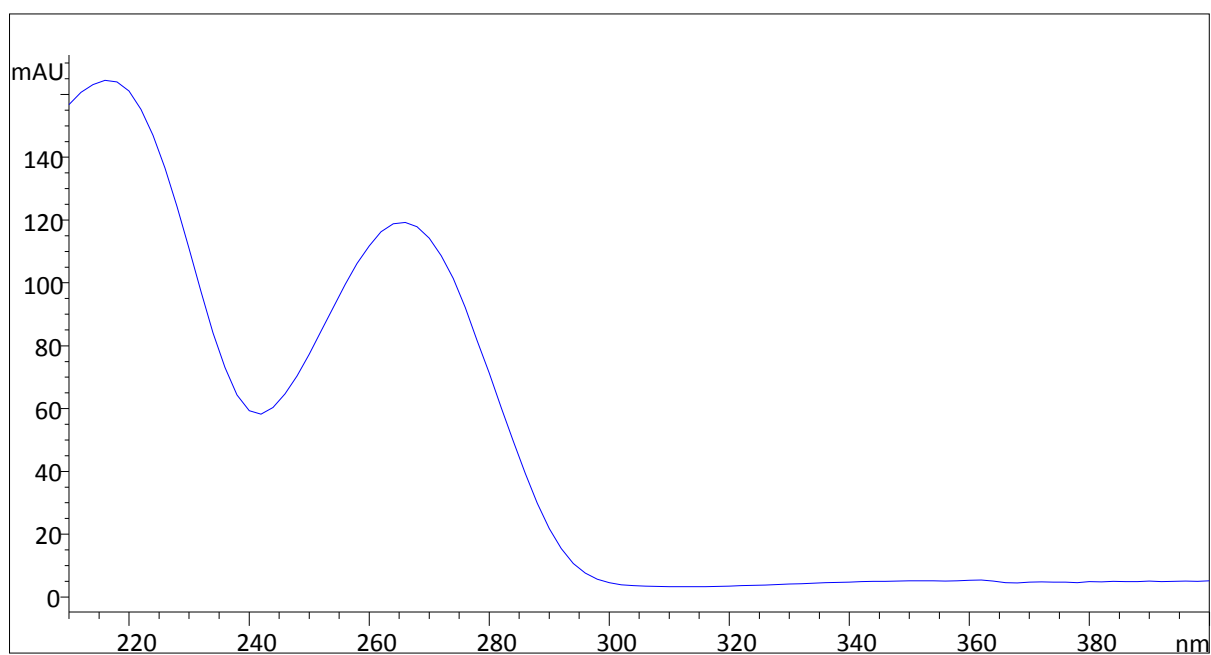

**Figure S10.** UV spectrum of the compound **5b**.



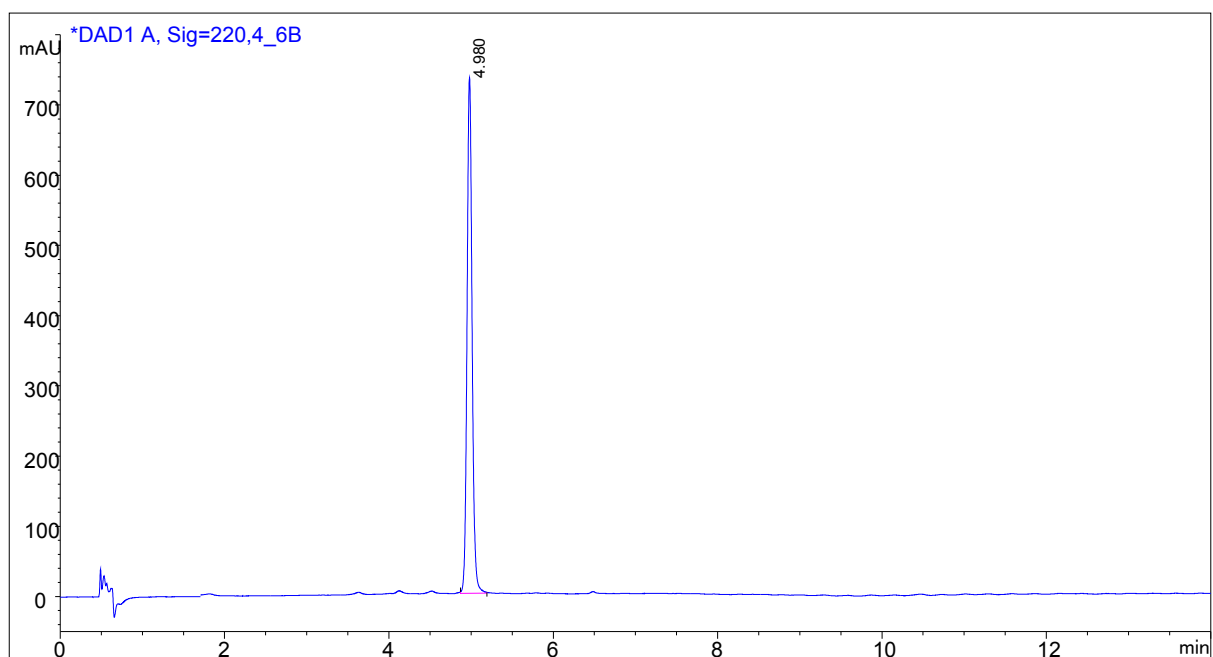

**Figure S11.** Chromatographic profile of **6b** monitored at  $\lambda=220$  nm.

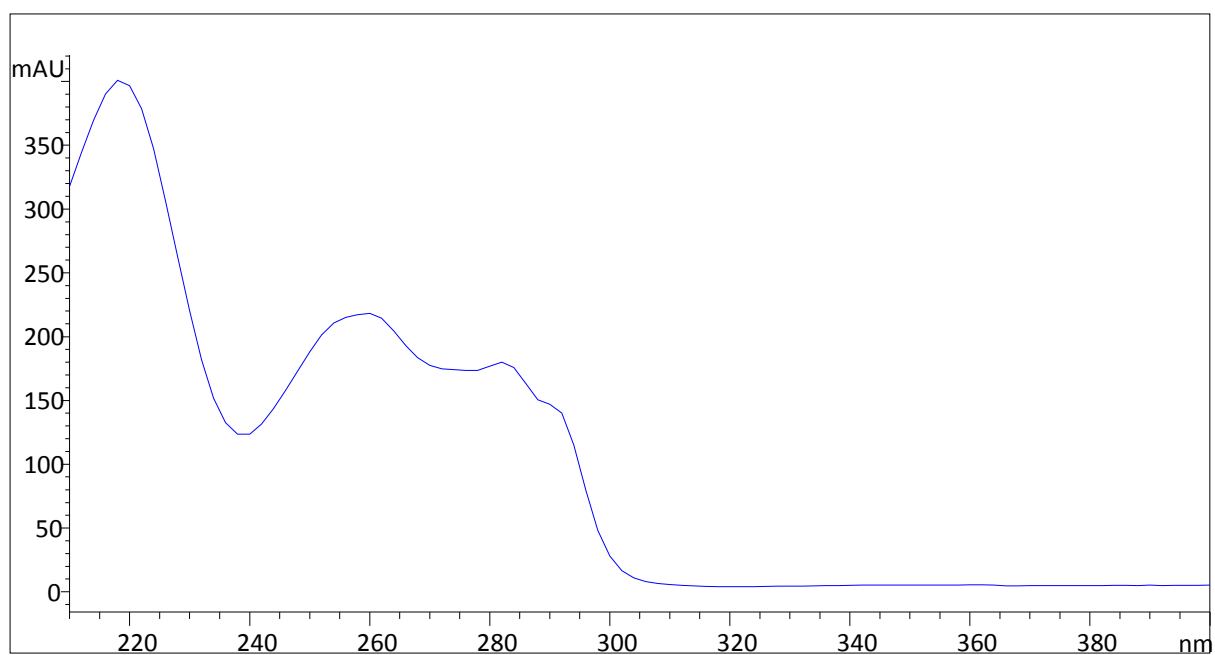

**Figure S12.** UV spectrum of the compound **6b**.

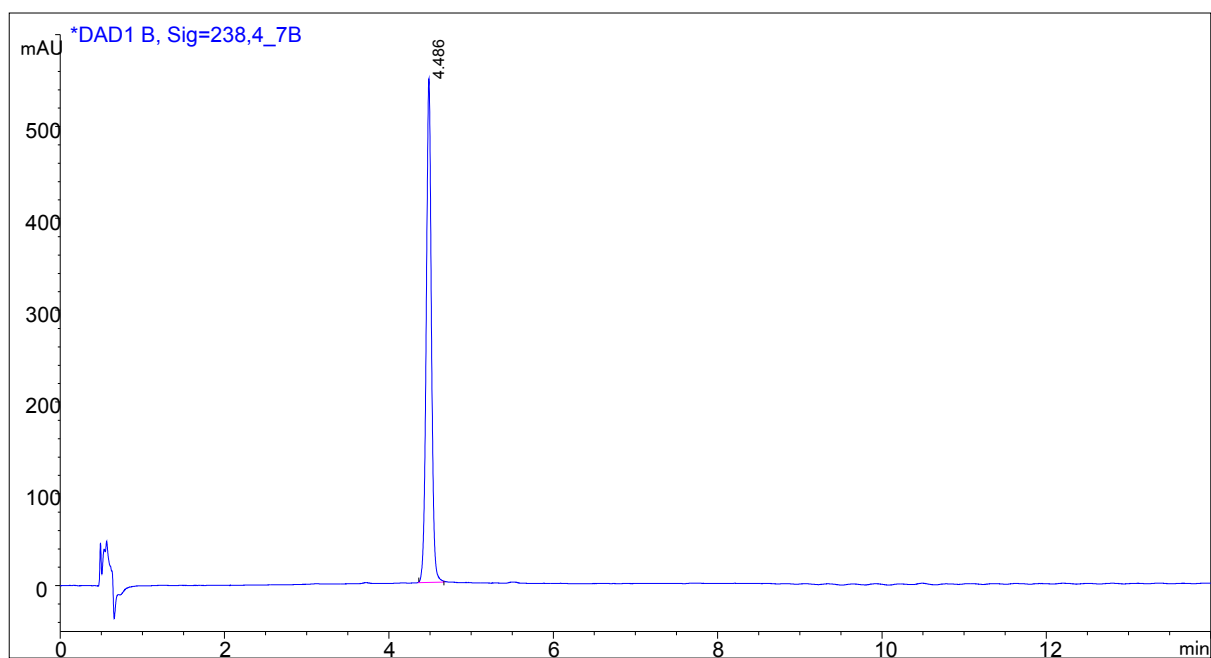

**Figure S13.** Chromatographic profile of **7b** monitored at  $\lambda=238$  nm.

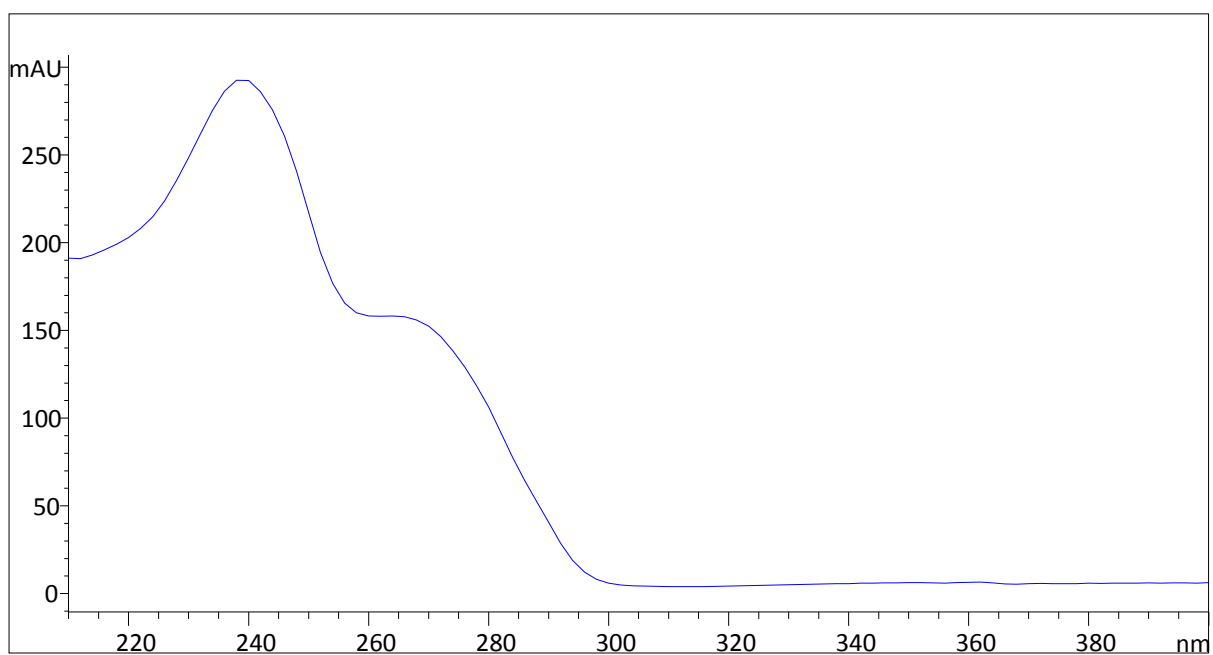

**Figure S14.** UV spectrum of the compound **7b**.

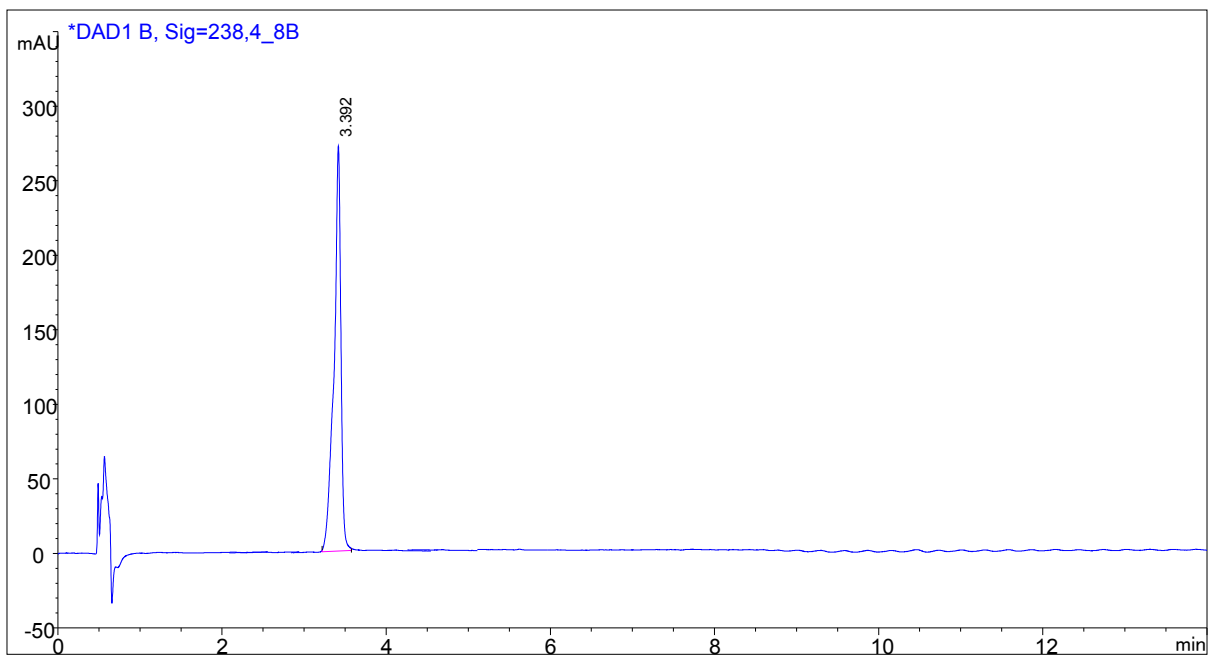

**Figure S15.** Chromatographic profile of **8b** monitored at  $\lambda=238$  nm.

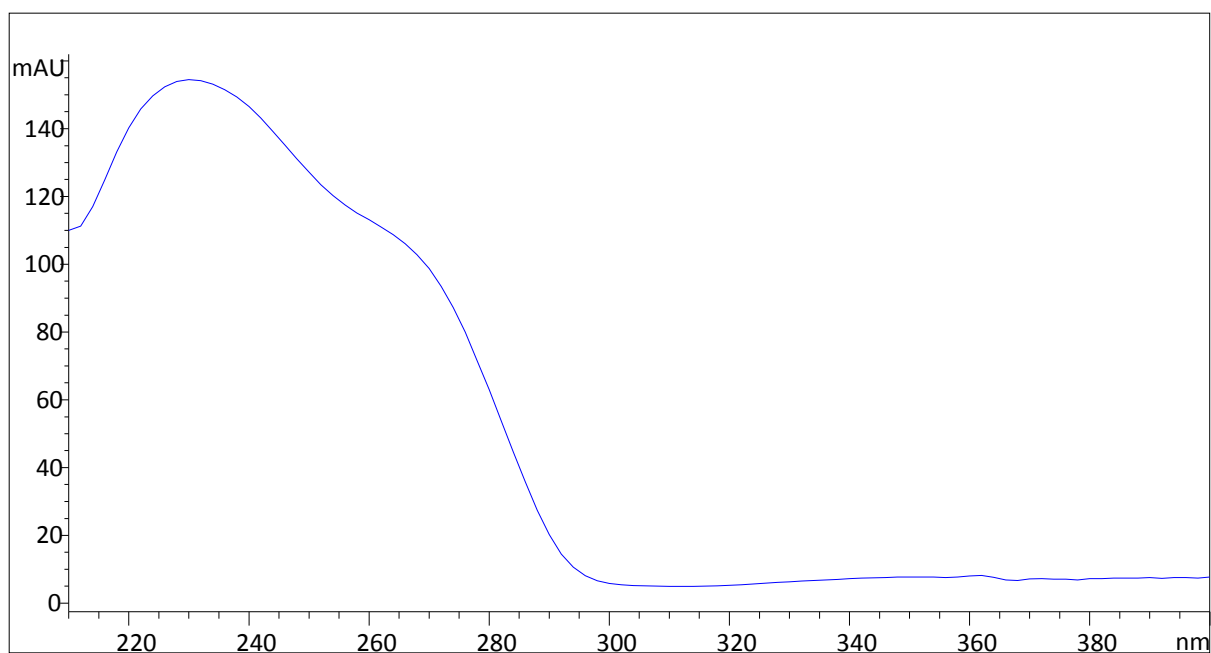

**Figure S16.** UV spectrum of the compound **8b**.

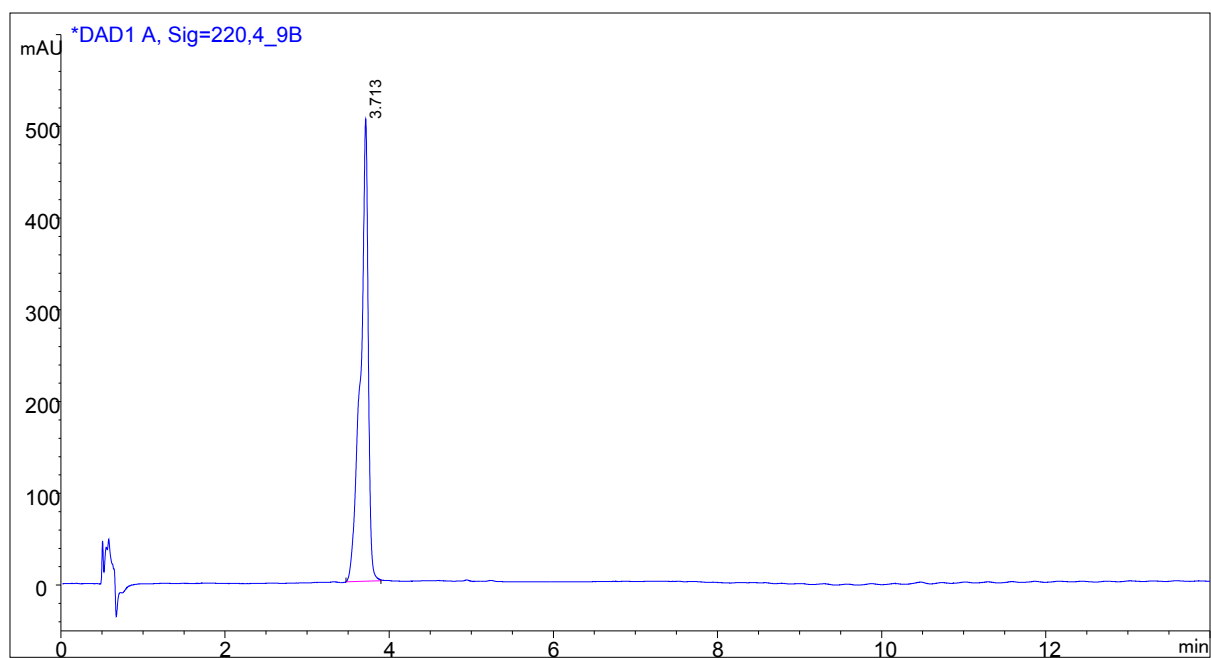

**Figure S17.** Chromatographic profile of **9b** monitored at  $\lambda=220$  nm.

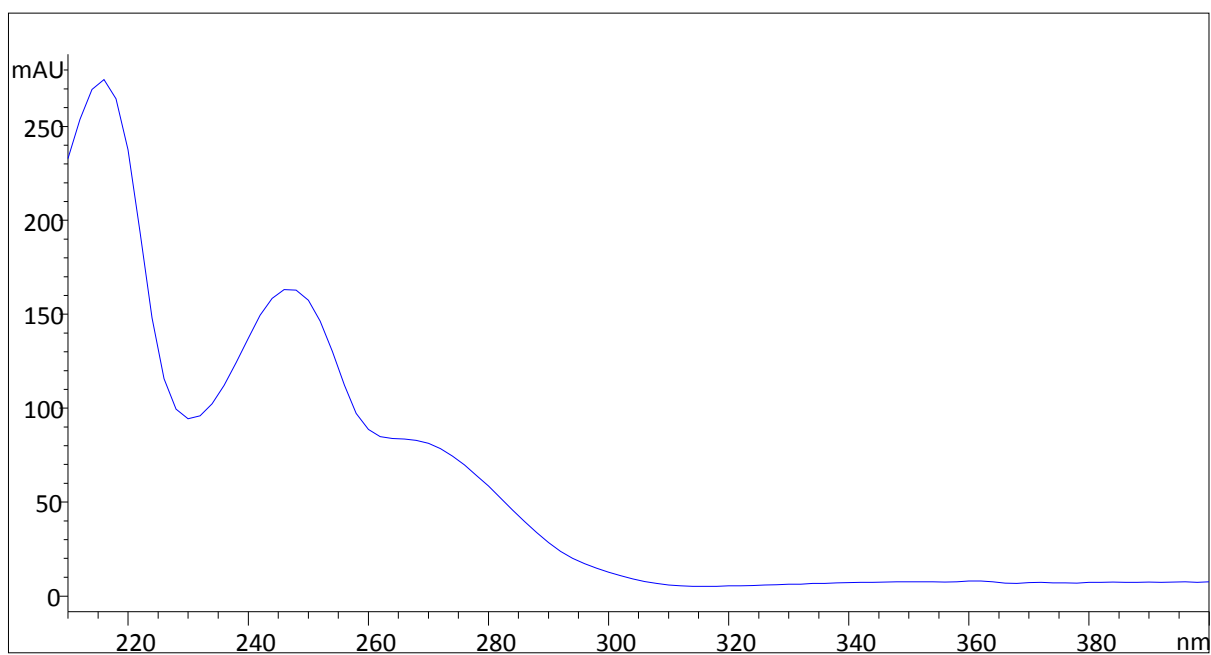

**Figure S18.** UV spectrum of the compound **9b**.

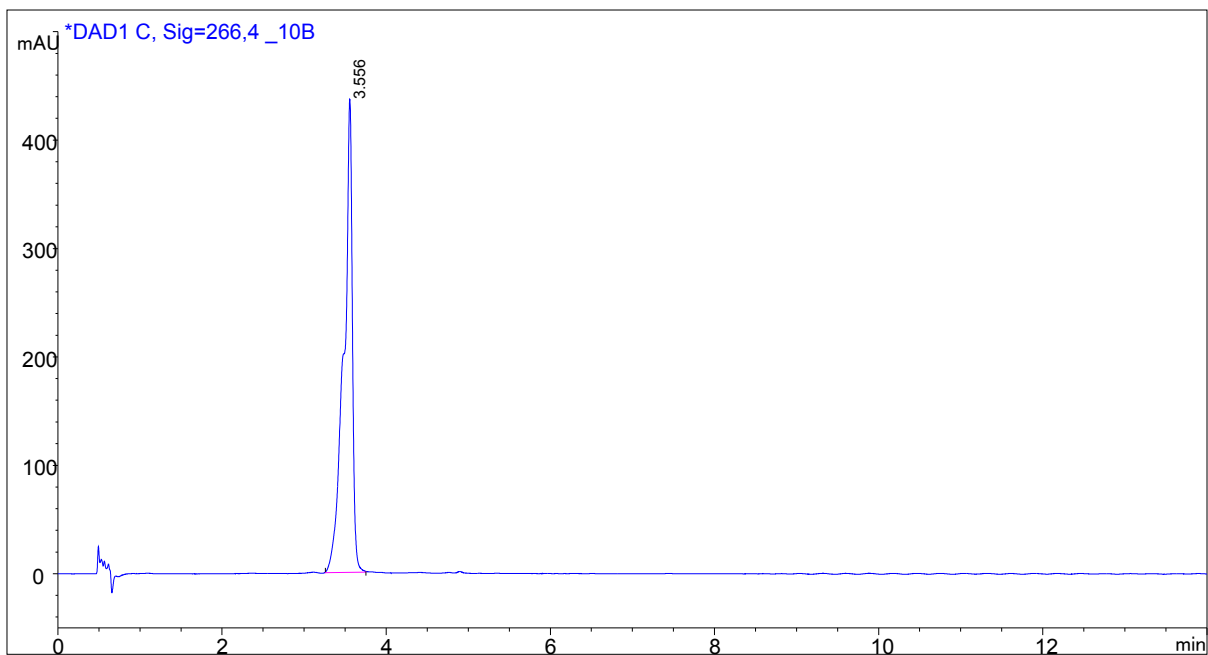

**Figure S19.** Chromatographic profile of **10b** monitored at  $\lambda=266$  nm.

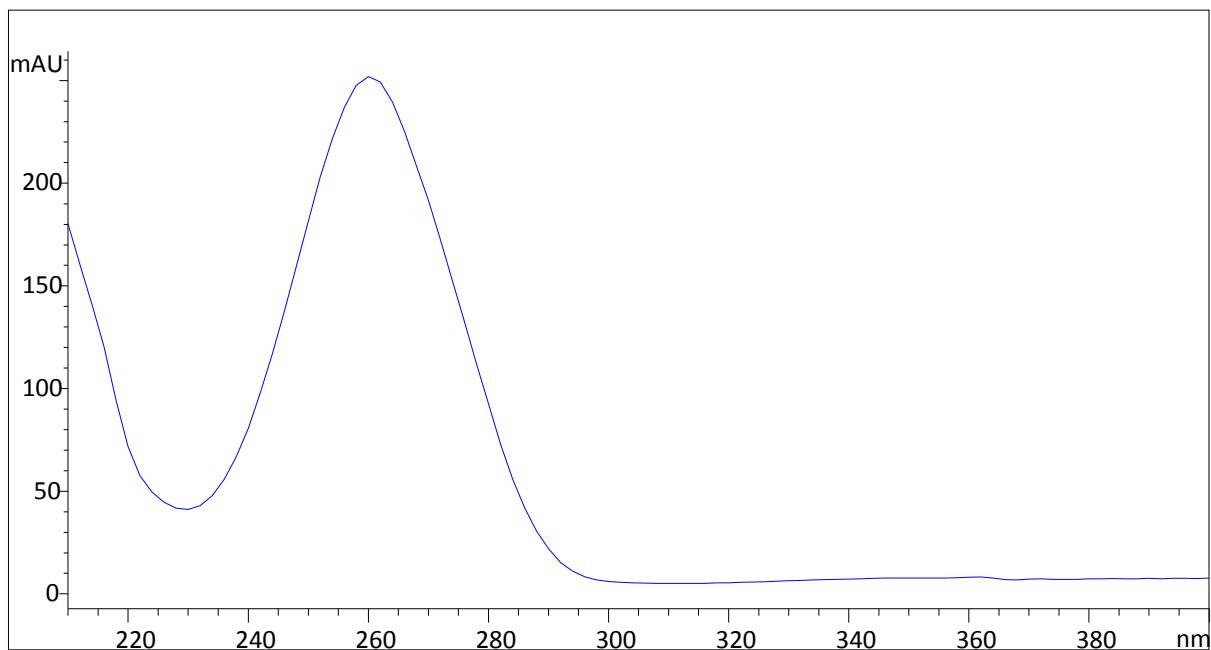

**Figure S20.** UV spectrum of the compound **10b**.

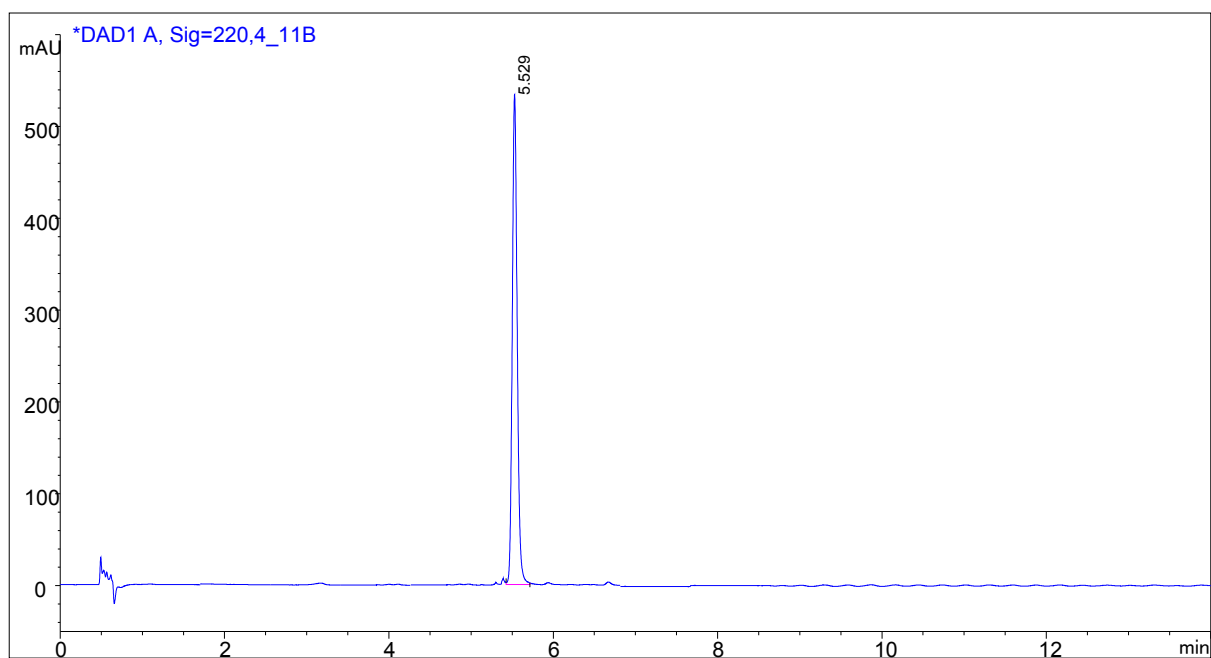

**Figure S21.** Chromatographic profile of **11b** monitored at  $\lambda=220$  nm.

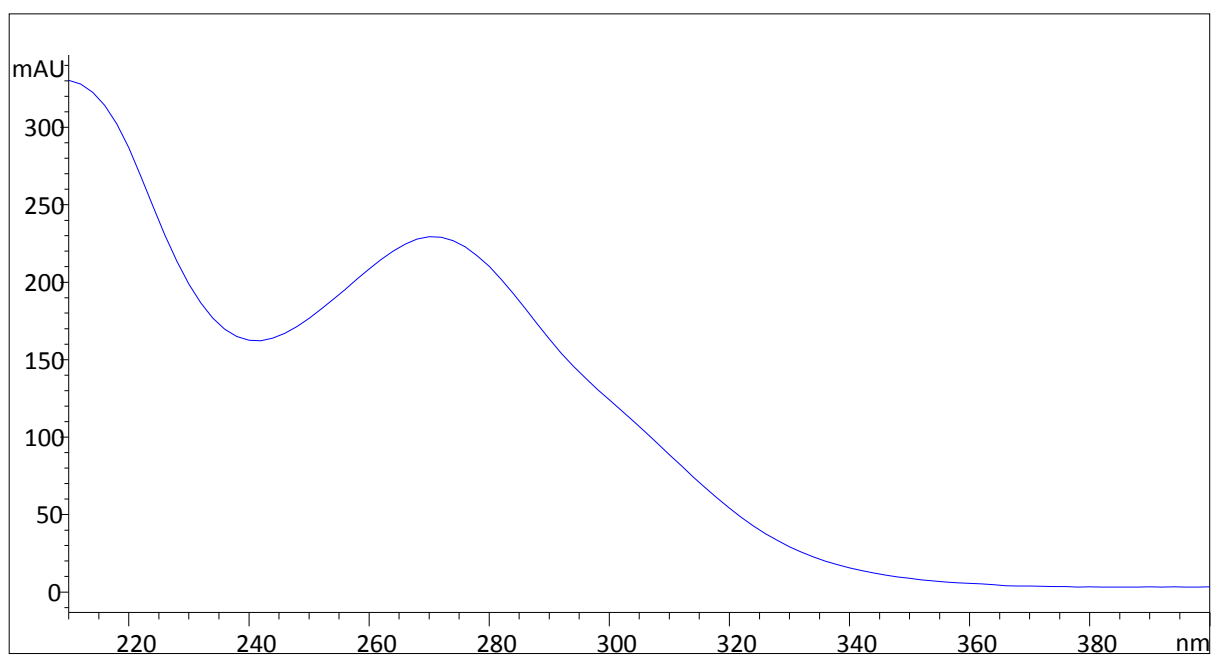

**Figure S22.** UV spectrum of the compound **11b**.

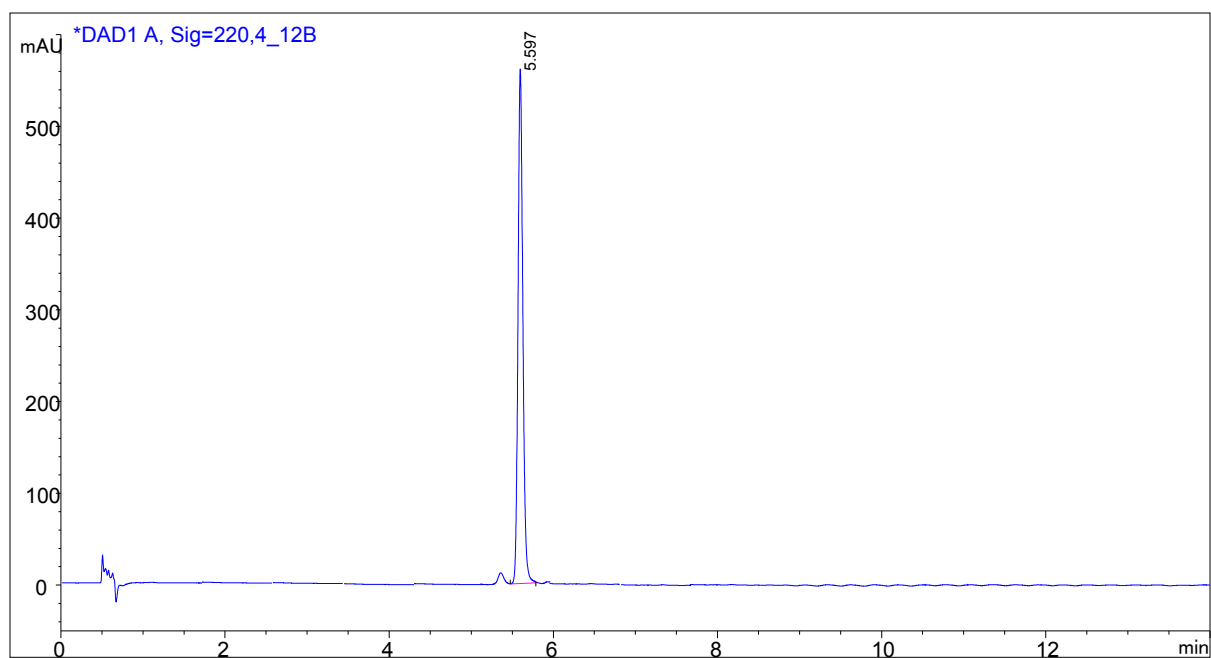

**Figure S23.** Chromatographic profile of **12b** monitored at  $\lambda=220$  nm.

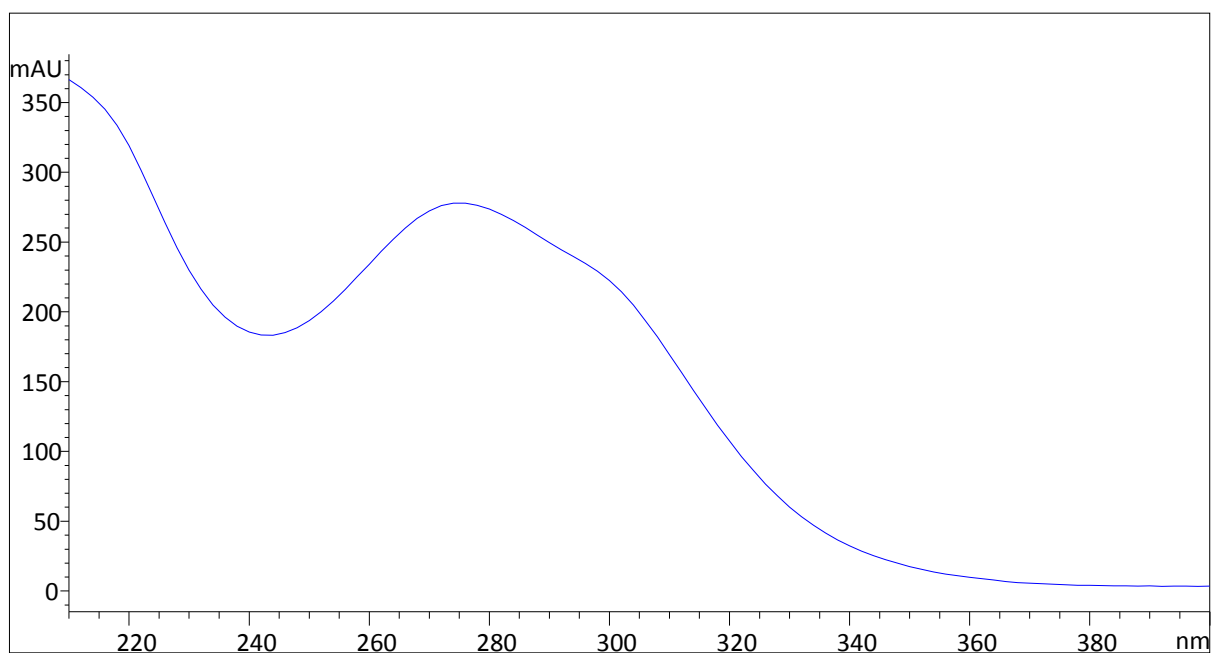

**Figure S24.** UV spectrum of the compound **12b**.

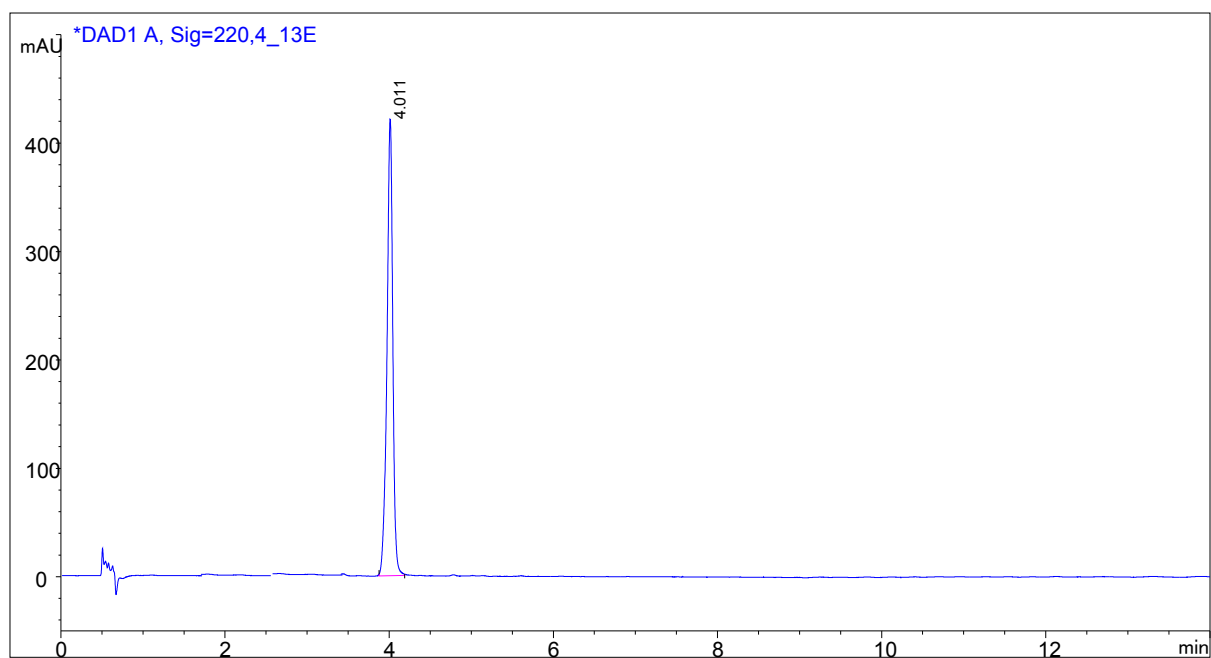

**Figure S25.** Chromatographic profile of **13e** monitored at  $\lambda=220$  nm.

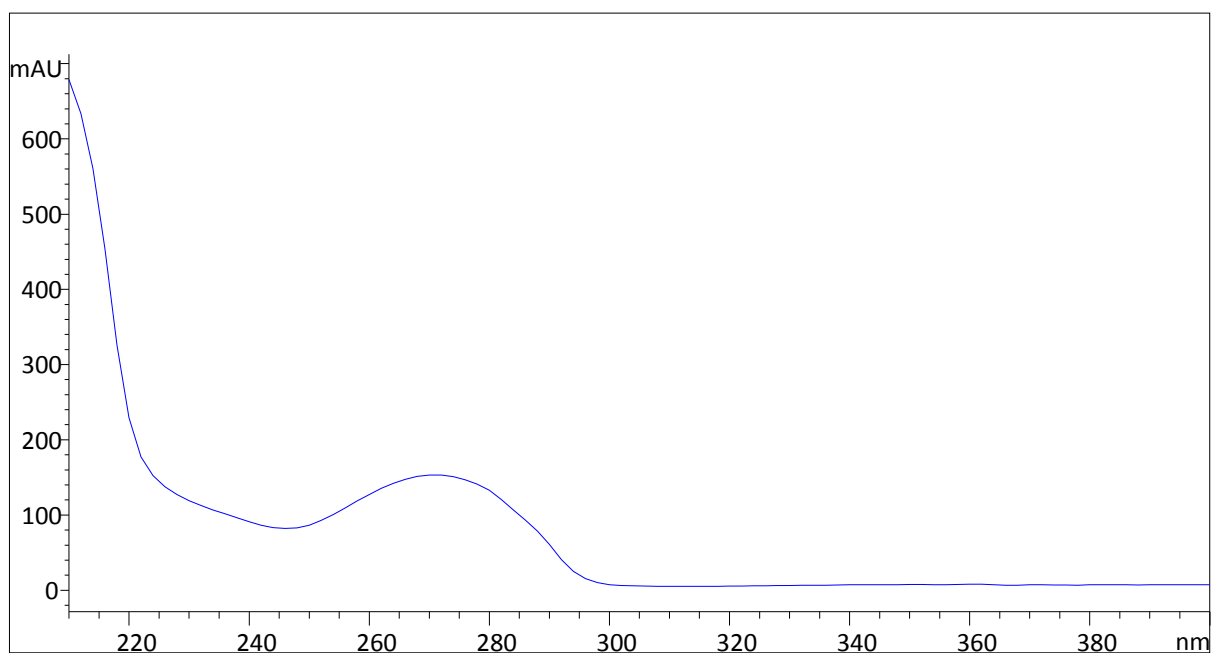

**Figure S26.** UV spectrum of the compound **13e**.



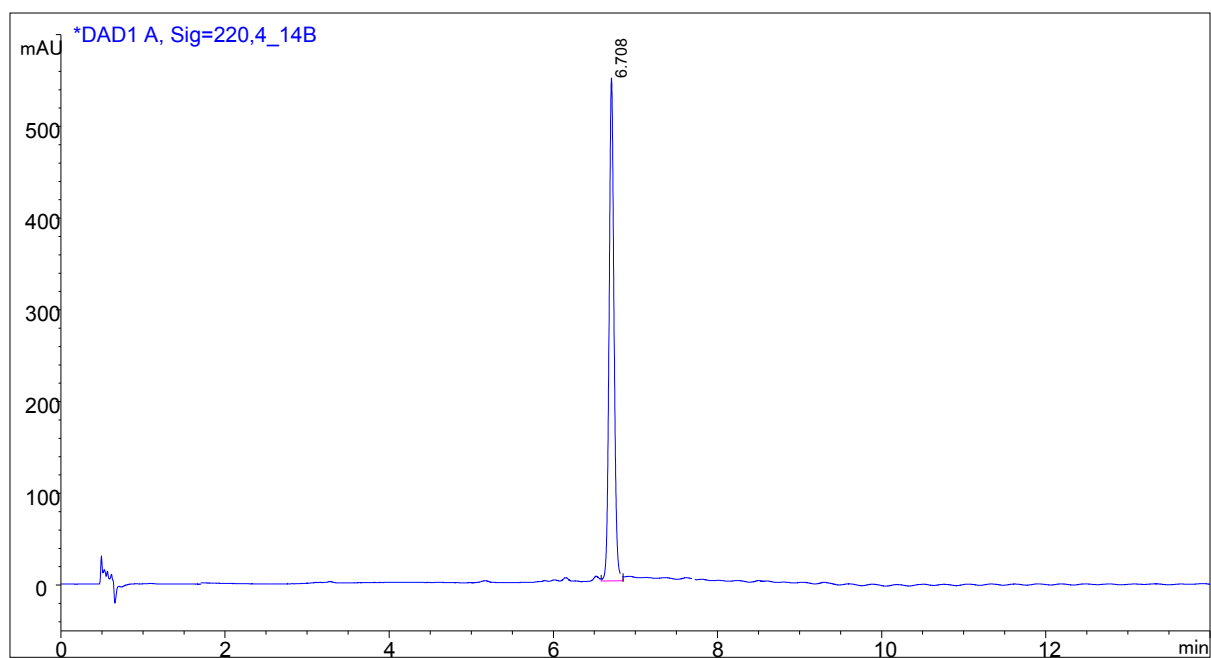

**Figure S27.** Chromatographic profile of **14b** monitored at  $\lambda=220$  nm.

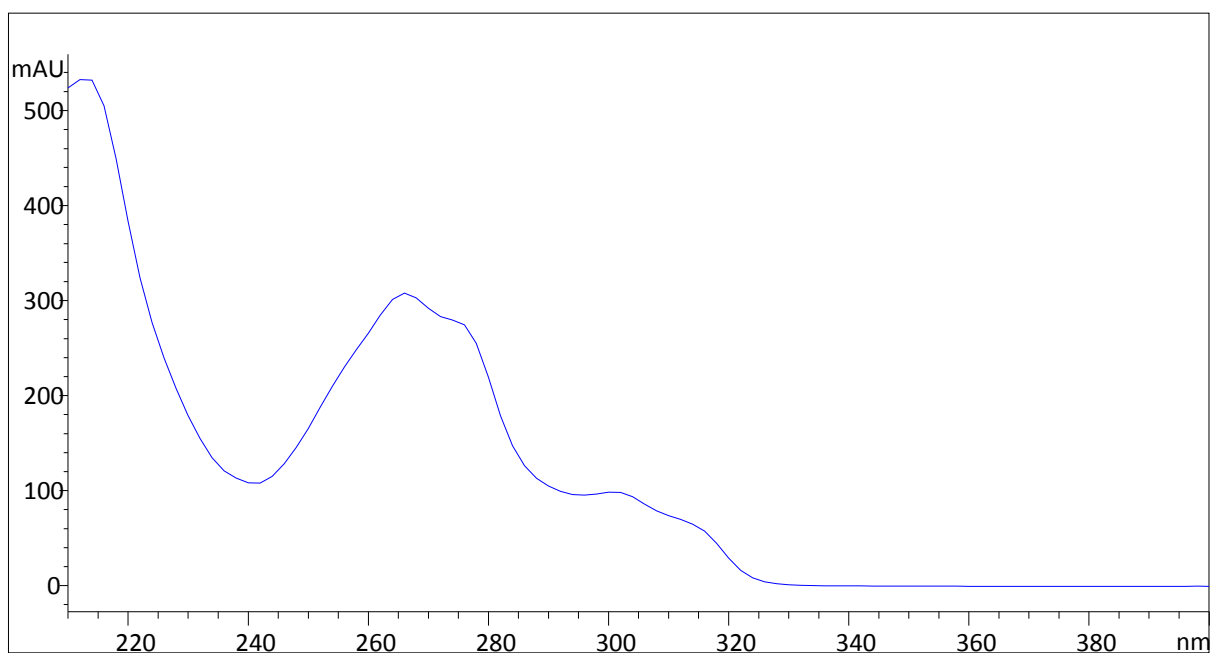

**Figure S28.** UV spectrum of the compound **14b**.

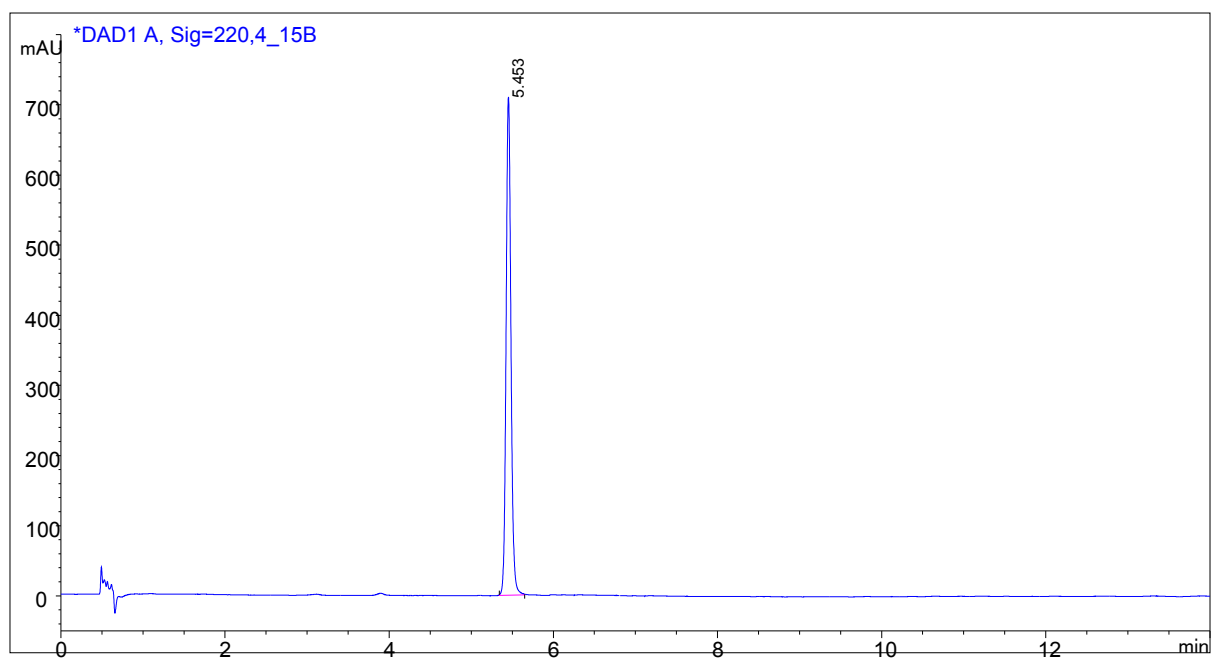

**Figure S29.** Chromatographic profile of **15b** monitored at  $\lambda=220$  nm.

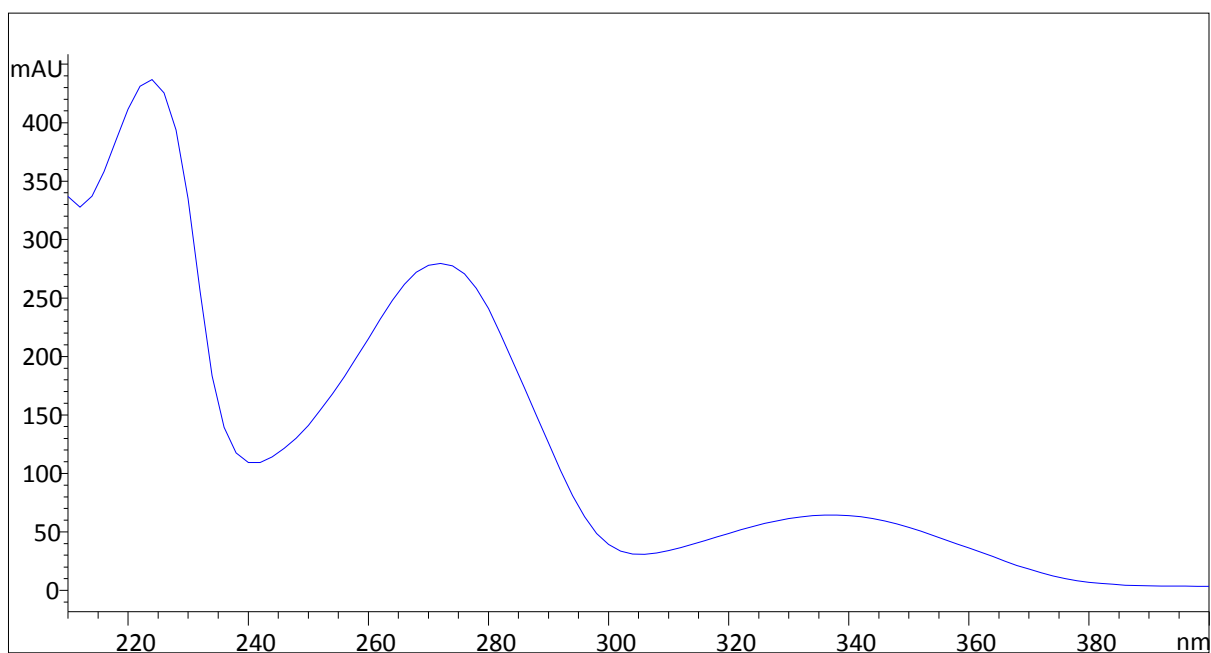

**Figure S30.** UV spectrum of the compound **15b**.

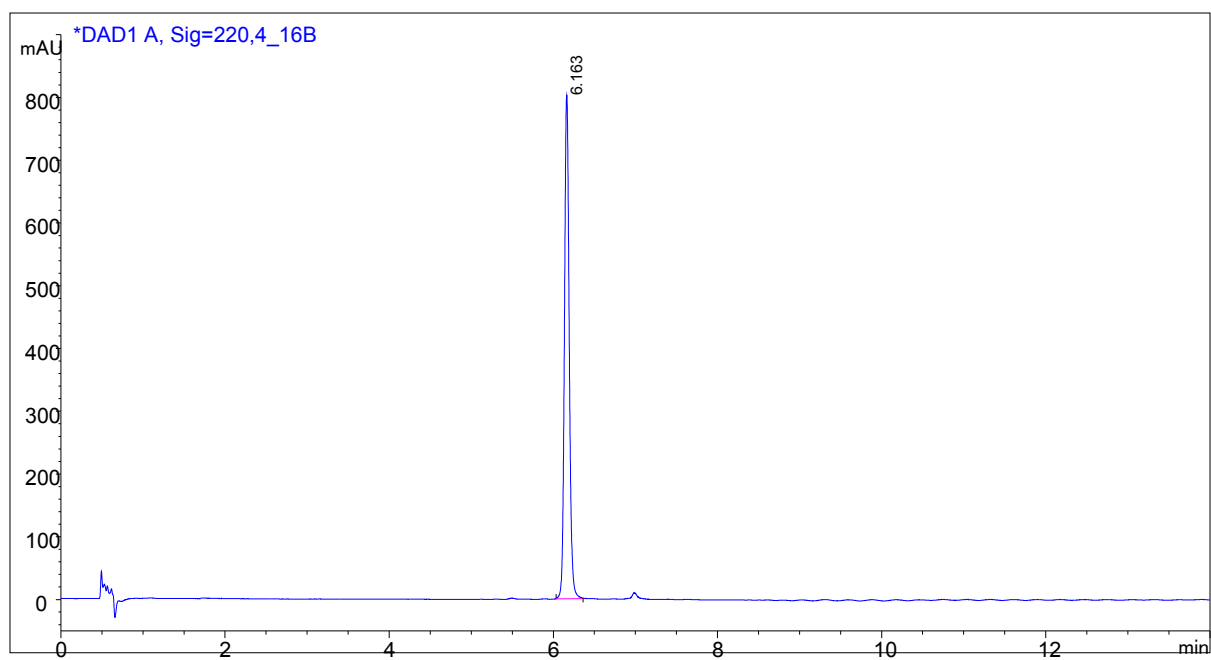

**Figure S31.** Chromatographic profile of **16b** monitored at  $\lambda=220$  nm.

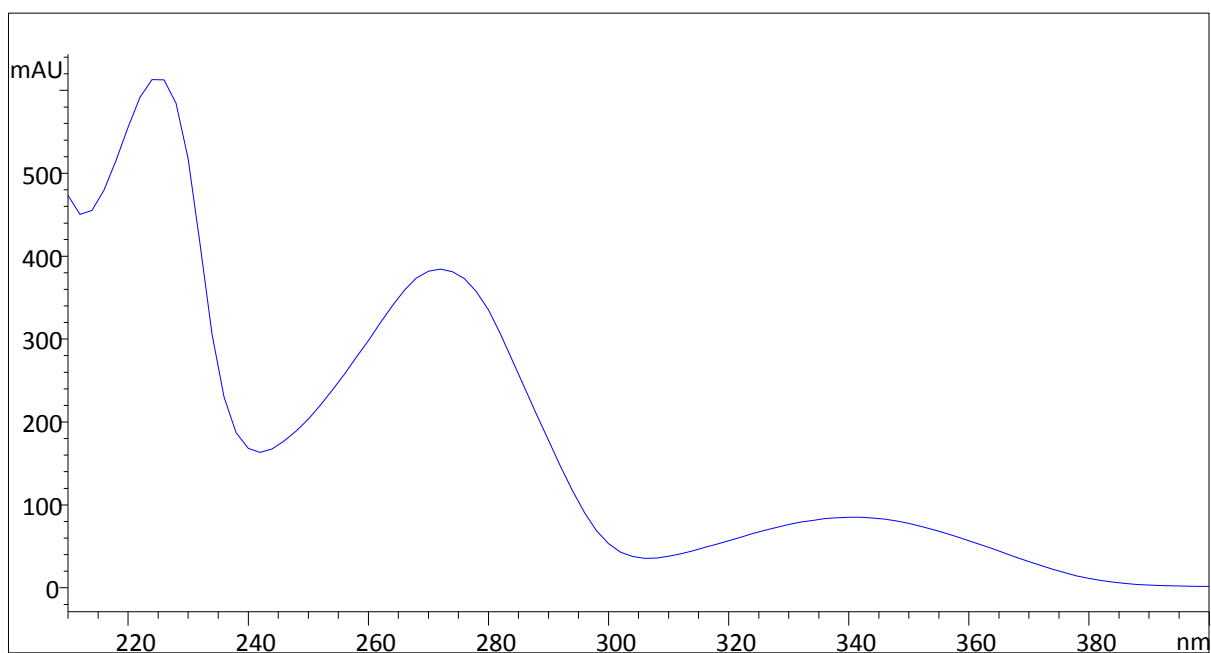

**Figure S32.** UV spectrum of the compound **16b**.

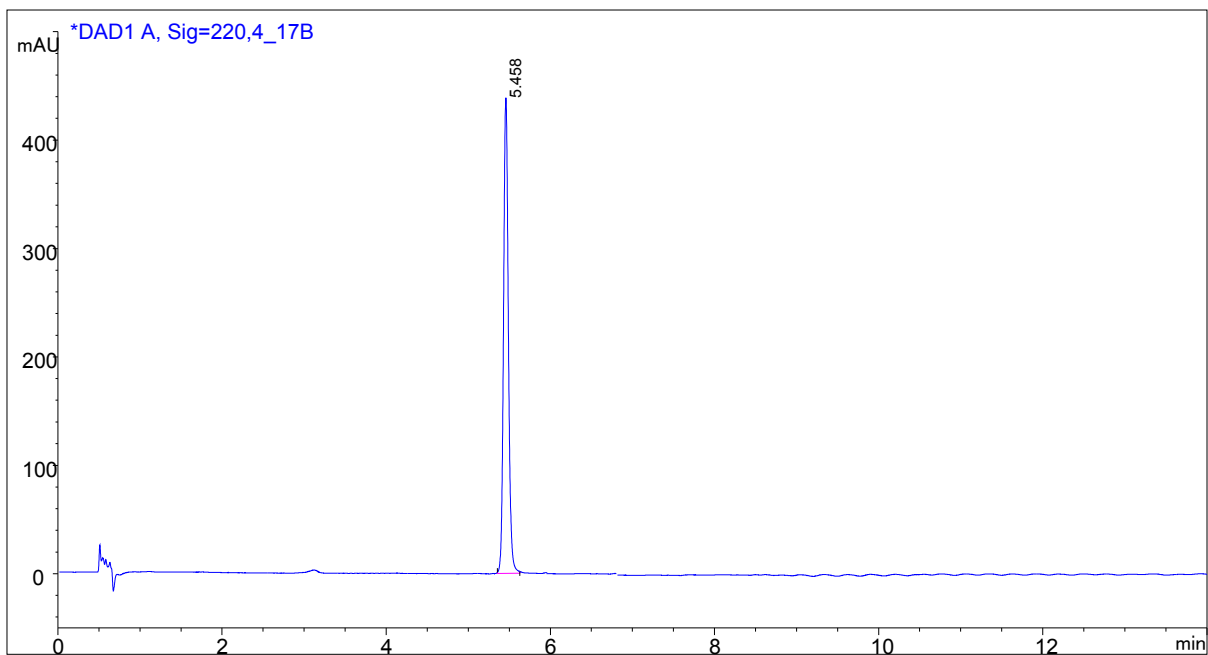

**Figure S33.** Chromatographic profile of **17b** monitored at  $\lambda=220$  nm.

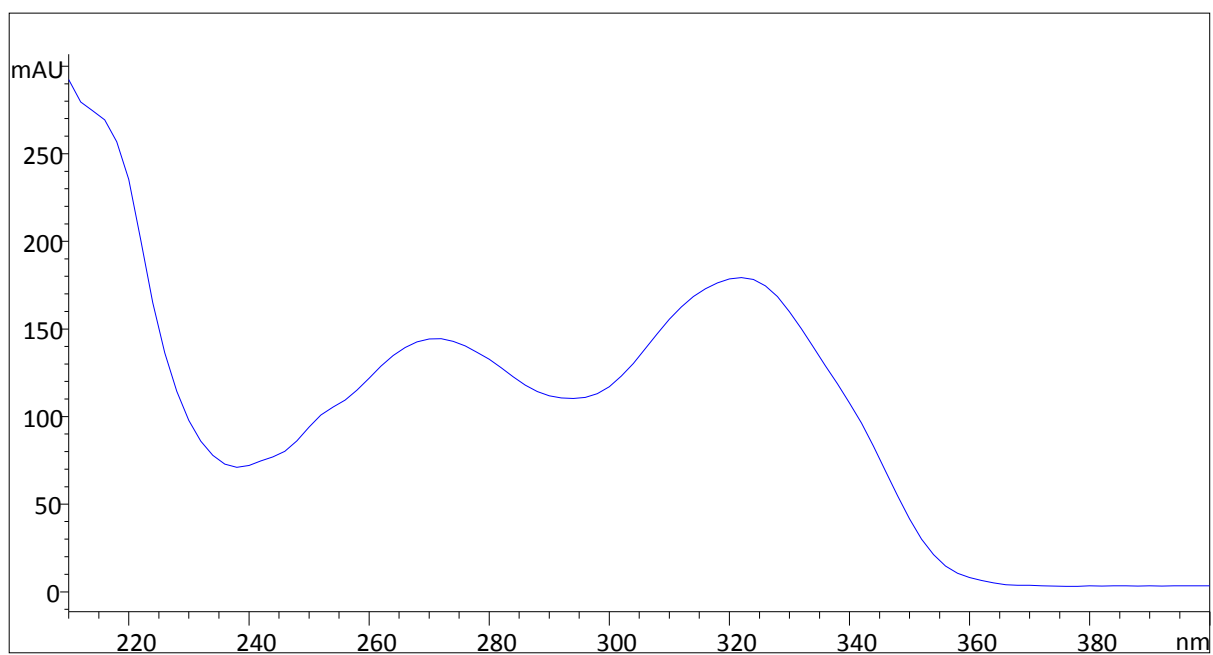

**Figure S34.** UV spectrum of the compound **17b**.

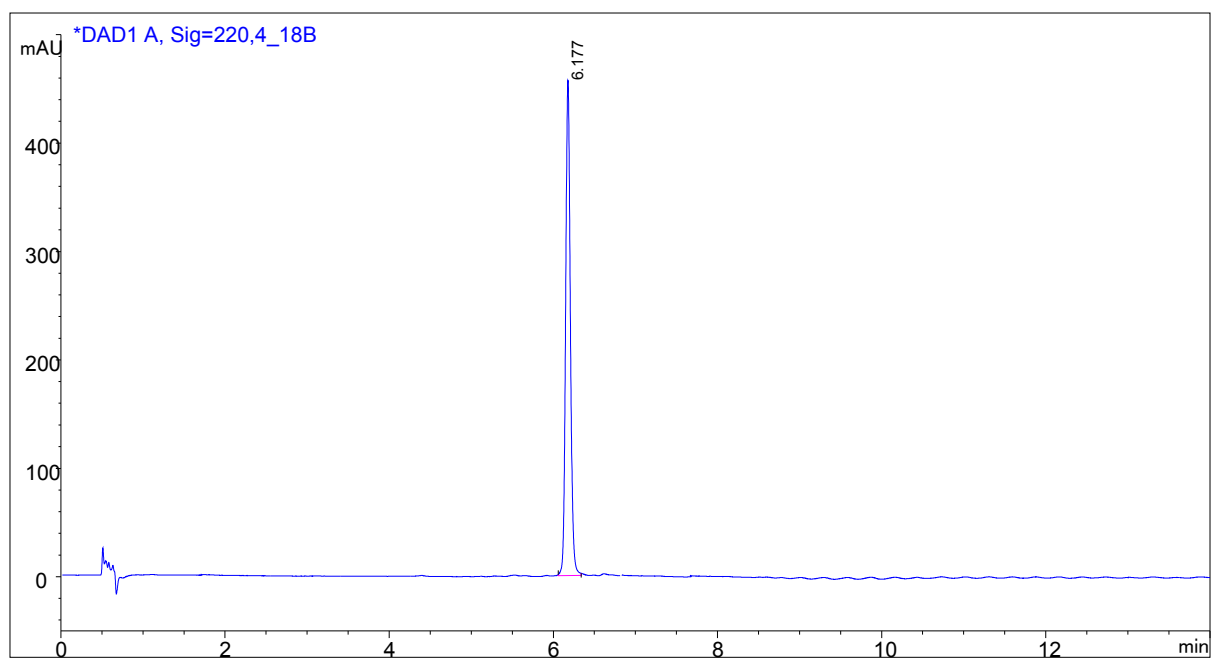

**Figure S35.** Chromatographic profile of **18b** monitored at  $\lambda=220$  nm.

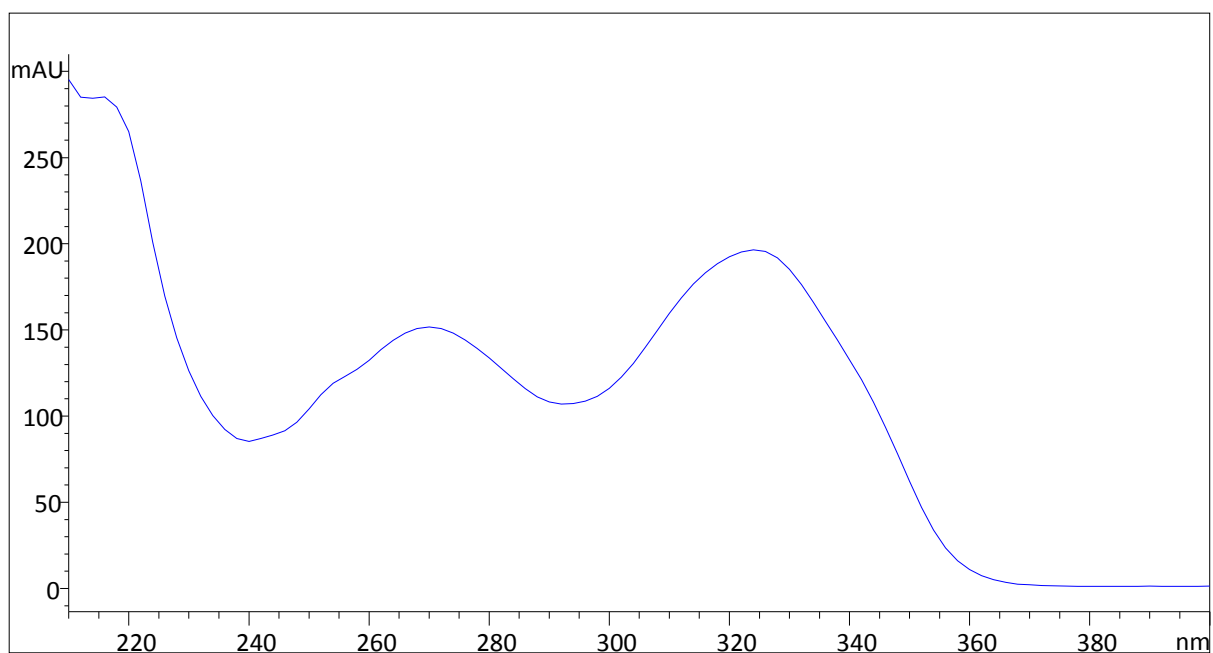

**Figure S36.** UV spectrum of the compound **18b**.

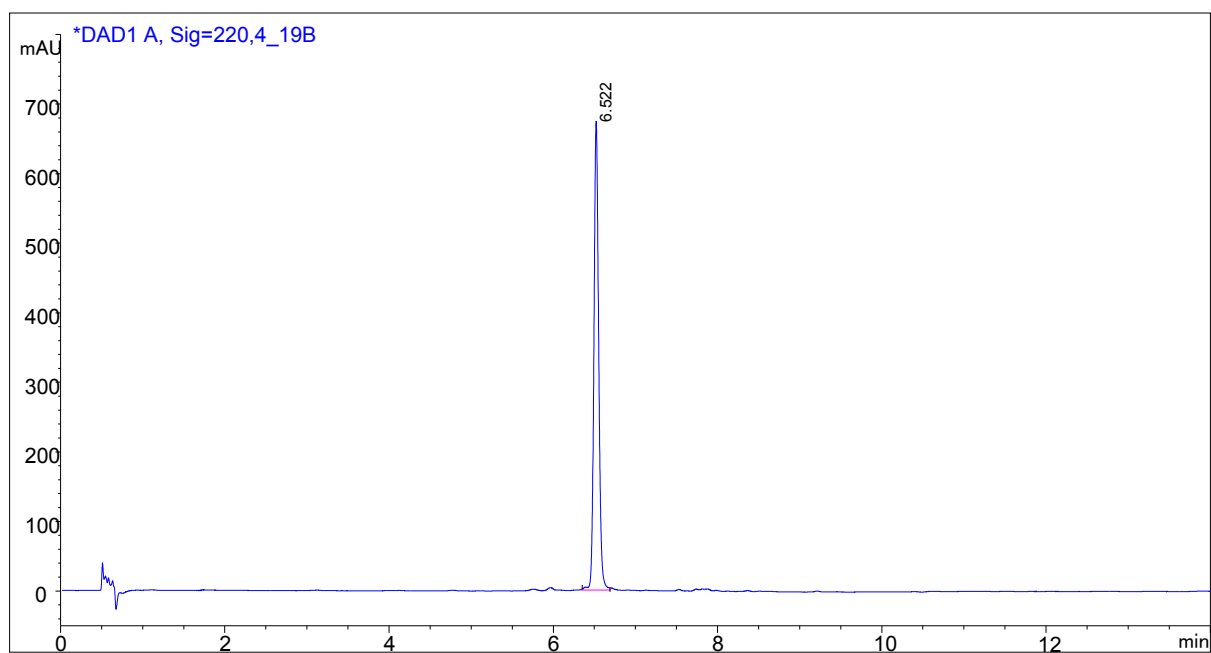

**Figure S37.** Chromatographic profile of **19b** monitored at  $\lambda=220$  nm.

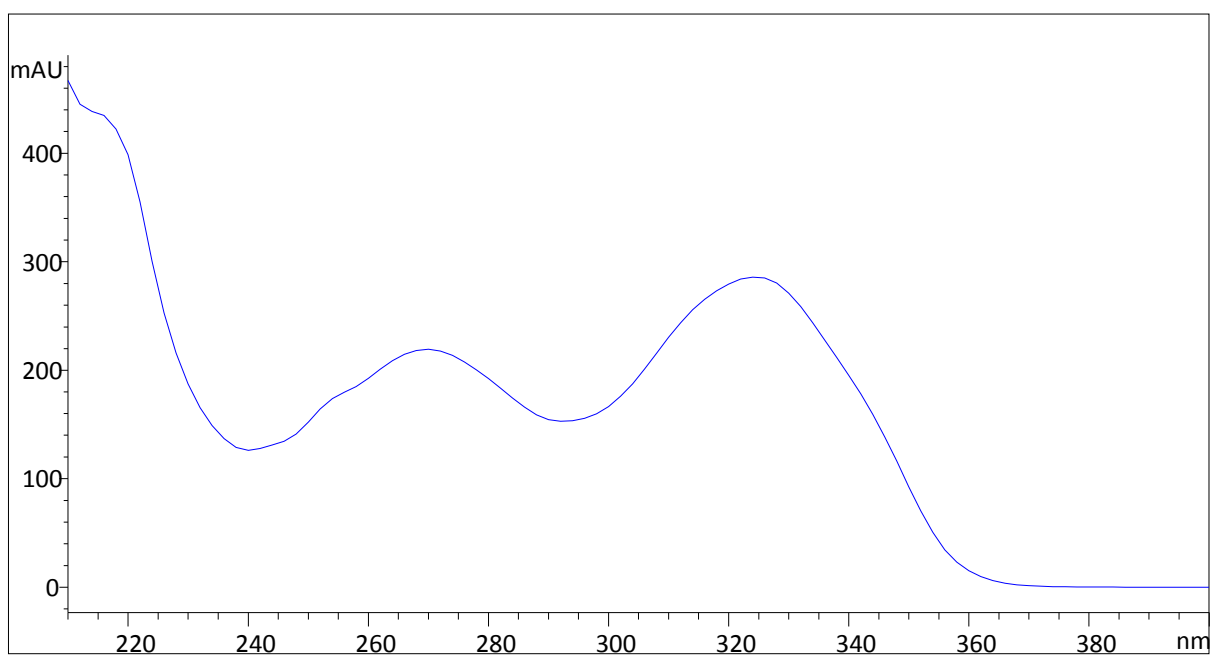

**Figure S38.** UV spectrum of the compound **19b**.

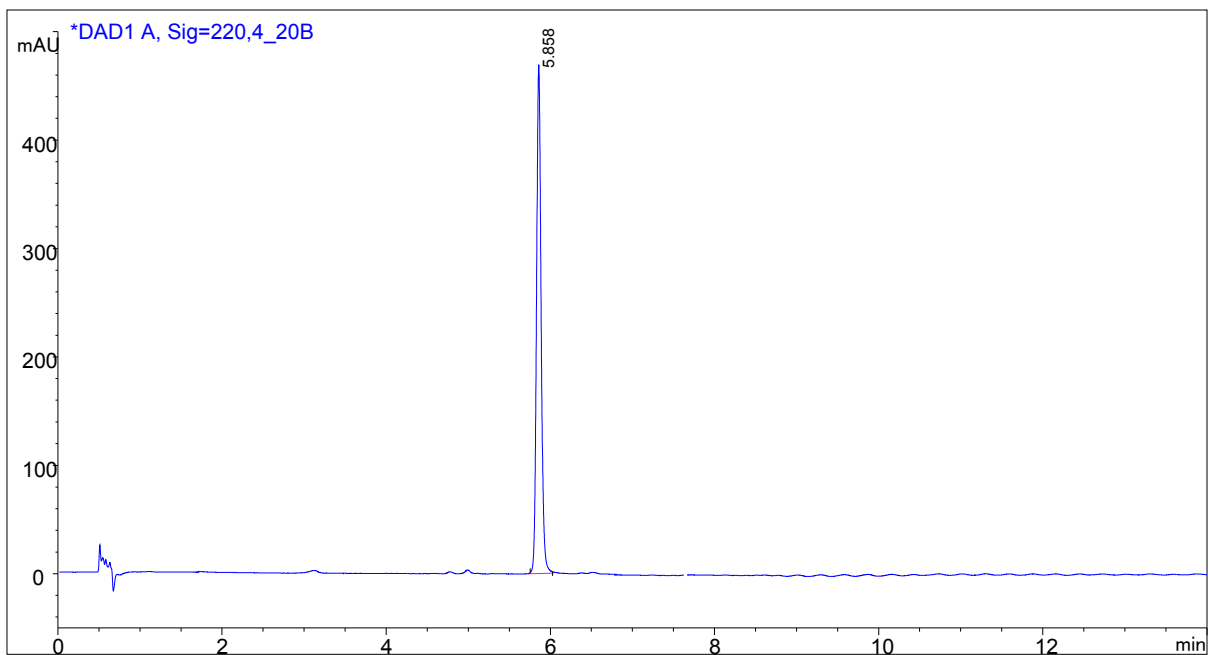

**Figure S39.** Chromatographic profile of **20b** monitored at  $\lambda=220$  nm.

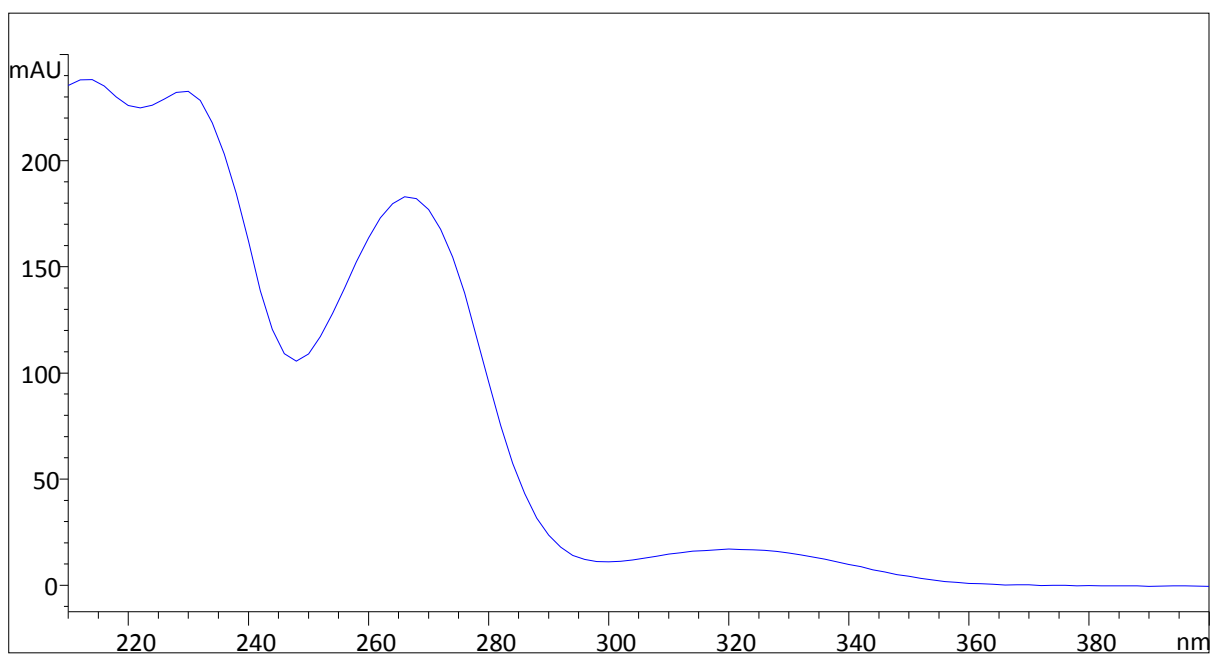

**Figure S40.** UV spectrum of the compound **20b**.
